# Supplementary material for: Revealing Intra- and Intermolecular Interactions Determining Physico-Chemical Features of Selected Quinolone Carboxylic Acid Derivatives
Source: MDPI journal article supplement (doi:10.3390/molecules27072299), 2022-04-01
Supplement: s1 [file s1]

## SUPPLEMENTARY MATERIAL

# Revealing Intra- and Intermolecular Interactions Determining Physico-chemical Features of Selected Quinolone Carboxylic Acid Derivatives

Kamil Wojtkowiak<sup>1</sup>, Aneta Jezierska<sup>1</sup>, Jarosław J. Panek<sup>1</sup>

<sup>1</sup> University of Wrocław, Faculty of Chemistry, ul. F. Joliot Curie 14, 50-383 Wrocław, Poland

Correspondence should be addressed to: aneta.jezierska@chem.uni.wroc.pl; jaroslaw.panek@chem.uni.wroc.pl

### Table of contents:

- I. **Figure S1.** Molecular structures of the studied quinolone carboxylic acid derivatives. Dotted line indicates the presence of an intramolecular hydrogen bond. Atom color coding: oxygen atoms – red, hydrogen atoms – white, carbon atoms – grey, chlorine atom – green, fluorine atom – orange and nitrogen atoms – blue.
- II. **Table S1.** Metric parameters of the intramolecular hydrogen bond. Comparison of experimental (X-ray) and computed data at the PBE-D3/aug-cc-pVTZ level of theory. Metric parameters are given in [Å] and [°]. For hydrogen bridge atoms notation see Figure S1.
- III. **Table S2.** AIM atomic charges of the O-H...O intramolecular hydrogen bond computed in vacuo and with solvent reaction field (PCM and water as a solvent) at the PBE-D3/aug-cc-pVTZ level of theory.
- IV. **Table S3.** Bond Critical Points (BCPs) obtained for the intramolecular hydrogen bridges in the studied quinolone carboxylic acid derivatives. Electron density  $\rho_{\text{BCP}}$  is given in  $\text{e}^*a_0^{-3}$  atomic units, and its Laplacian  $\nabla^2\rho_{\text{BCP}}$  in  $\text{e}^*a_0^{-5}$  units.
- V. **Table S4.** Wiberg bond indices calculated based on Natural Atomic Orbitals (NAO) at the PBE-D3/aug-cc-pVTZ level of theory.

- VI. Figure S2.** Dimers of the quinolone carboxylic acid derivatives obtained as a result of the geometry optimization at the PBE-D3/aug-cc-pVDZ level of theory studied based on the SAPT. Atom color coding: oxygen atoms -red, hydrogen atoms - white, carbon atoms - grey, chlorine atom - green, fluorine atoms - yellow and nitrogen atoms - blue.
- VII. Figure S3.** Topological maps of electron density based on AIM theory for the selected dimers of the quinolone carboxylic acid derivatives at the experimental X-ray geometry. Small green spheres denote Bond Critical Points (BCPs), small red spheres denote Ring Critical Points (RCPs). Atom color coding: oxygen atoms – red, hydrogen atoms – white, carbon atoms – grey, chlorine atom – green, fluorine atom – lime green and nitrogen atoms – blue.
- VIII. Table S5.** Bond Critical Points (BCPs) obtained for the intermolecular contacts in the selected dimers of the studied quinolone carboxylic acid derivatives at the experimental (X-ray) geometry. Electron density  $\rho_{\text{BCP}}$  is given in  $e^*a_0^{-3}$  atomic units, and its Laplacian  $\nabla^2\rho_{\text{BCP}}$  in  $e^*a_0^{-5}$  units. The potential energy density  $V_{\text{BCP}}$  is given in hartree $\cdot a_0^{-3}$  atomic units, while the corresponding dissociation energy  $D_{\text{e,BCP}}$  is given in kcal/mol according to the Espinosa equation. The atoms marked with apostrophe are located in the monomer 2 of the dimeric system.
- IX. Figure S4.** Time evolution of atoms involved in the intramolecular hydrogen bond formation. Top panel: CPMD results of the gas phase. Bottom panel: CPMD results of the solid state.

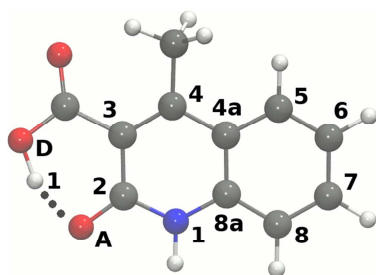

(1)

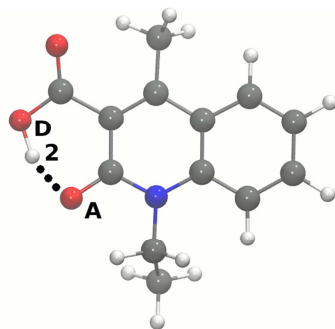

(2)

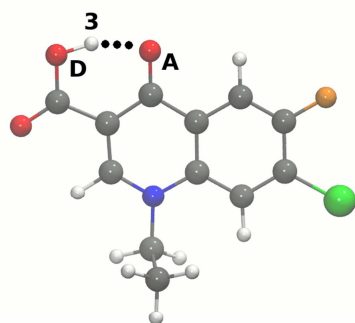

(3)

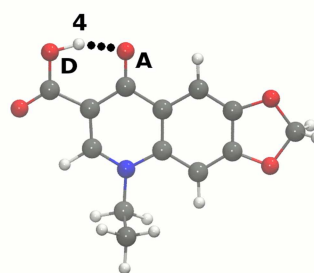

(4)

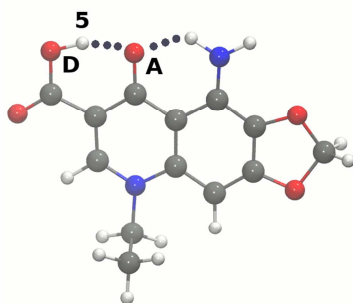

(5)

**Figure S1.** Molecular structures of the studied quinolone carboxylic acid derivatives. Dotted line indicates the presence of an intramolecular hydrogen bond. Atom color coding: oxygen atoms – red, hydrogen atoms – white, carbon atoms – grey, chlorine atom – green, fluorine atom – orange and nitrogen atoms – blue.

**Table S1.** Metric parameters of the intramolecular hydrogen bond. Comparison of experimental (X-ray) and computed data at the PBE-D3/aug-cc-pVTZ level of theory. Metric parameters are given in [Å] and [°]. For hydrogen bridge atoms notation see Figure S1.

| Metric parameters           | Experimental<br>X-ray data | PBE-D3/aug-cc-<br>pVTZ ( <i>in vacuo</i> ) | PBE-D3/aug-cc-<br>pVTZ (PCM)* |
|-----------------------------|----------------------------|--------------------------------------------|-------------------------------|
| <b>Compound 1 Ref. [10]</b> |                            |                                            |                               |
| <b>OD...OA</b>              | <b>2.465</b>               | <b>2.5196</b>                              | <b>2.4767</b>                 |
| <b>OD-H1</b>                | <b>0.895</b>               | <b>1.0172</b>                              | <b>1.0355</b>                 |
| <b>H1...OA</b>              | <b>1.638</b>               | <b>1.5616</b>                              | <b>1.4910</b>                 |
| <b>&lt;ODH1OA</b>           | <b>152.14</b>              | <b>154.83</b>                              | <b>156.81</b>                 |
| <b>Compound 2 Ref. [17]</b> |                            |                                            |                               |
| <b>OD...OA</b>              | <b>2.451</b>               | <b>2.5079</b>                              | <b>2.4622</b>                 |
| <b>OD-H2</b>                | <b>0.940</b>               | <b>1.0177</b>                              | <b>1.0387</b>                 |
| <b>H1...OA</b>              | <b>1.548</b>               | <b>1.5506</b>                              | <b>1.4734</b>                 |
| <b>&lt;ODH2OA</b>           | <b>159.8</b>               | <b>154.5</b>                               | <b>156.8</b>                  |
| <b>Compound 3 Ref. [18]</b> |                            |                                            |                               |
| <b>OD...OA</b>              | <b>2.549</b>               | <b>2.5868</b>                              | <b>2.5253</b>                 |
| <b>OD-H3</b>                | <b>0.820</b>               | <b>1.0158</b>                              | <b>1.0346</b>                 |
| <b>H1...OA</b>              | <b>1.785</b>               | <b>1.6306</b>                              | <b>1.5405</b>                 |
| <b>&lt;ODH3OA</b>           | <b>154.5</b>               | <b>154.9</b>                               | <b>157.0</b>                  |
| <b>Compound 4 Ref. [11]</b> |                            |                                            |                               |
| <b>OD...OA</b>              | <b>2.545</b>               | <b>2.5703</b>                              | <b>2.5025</b>                 |
| <b>OD-H4</b>                | <b>0.964</b>               | <b>1.0205</b>                              | <b>1.0453</b>                 |
| <b>H1...OA</b>              | <b>1.648</b>               | <b>1.6056</b>                              | <b>1.5020</b>                 |
| <b>&lt;ODH4OA</b>           | <b>153.0</b>               | <b>155.7</b>                               | <b>158.1</b>                  |
| <b>Compound 5 Ref. [12]</b> |                            |                                            |                               |
| <b>OD...OA</b>              | <b>2.518</b>               | <b>2.5627</b>                              | <b>2.4991</b>                 |
| <b>OD-H5</b>                | <b>0.941</b>               | <b>1.0172</b>                              | <b>1.0402</b>                 |
| <b>H1...OA</b>              | <b>1.626</b>               | <b>1.6027</b>                              | <b>1.5056</b>                 |
| <b>&lt;ODH5OA</b>           | <b>156.6</b>               | <b>155.4</b>                               | <b>157.6</b>                  |

\*water was used as a solvent

**Table S1 (Continuation).** Metric parameters of the intramolecular hydrogen bond. Comparison of experimental (X-ray) and computed data at the PBE-D3/aug-cc-pVTZ level of theory. Metric parameters are given in [Å] and [°]. For hydrogen bridge atoms notation see Figure S1.

| Metric parameters           | Experimental X-ray data | PBE-D3/aug-cc-pVTZ<br>( <i>in vacuo</i> ) | PBE-D3/aug-cc-pVTZ<br>(PCM)* |
|-----------------------------|-------------------------|-------------------------------------------|------------------------------|
| <b>Compound 5 Ref. [12]</b> |                         |                                           |                              |
| <b>N...OA</b>               | <b>2.664</b>            | <b>2.6307</b>                             | <b>2.6608</b>                |
| <b>N-H</b>                  | <b>0.865</b>            | <b>1.0223</b>                             | <b>1.0193</b>                |
| <b>H...OA</b>               | <b>1.978</b>            | <b>1.8343</b>                             | <b>1.8819</b>                |
| <b>&lt;NHOA</b>             | <b>135.5</b>            | <b>132.0</b>                              | <b>130.7</b>                 |

\*water was used as a solvent

**Table S2.** AIM atomic charges of the O-H...O intramolecular hydrogen bond computed *in vacuo* and with solvent reaction field (PCM and water as a solvent) at the PBE-D3/aug-cc-pVTZ level of theory.

| Atomic charge [e] | Gas phase      | PCM            |
|-------------------|----------------|----------------|
| <b>Compound 1</b> |                |                |
| <b>qOD</b>        | <b>-1.1136</b> | <b>-1.1369</b> |
| <b>qH1</b>        | <b>0.6254</b>  | <b>0.6259</b>  |
| <b>qOA</b>        | <b>-1.1177</b> | <b>-1.1390</b> |
| <b>Compound 2</b> |                |                |
| <b>qOD</b>        | <b>-1.1159</b> | <b>-1.1391</b> |
| <b>qH2</b>        | <b>0.6259</b>  | <b>0.6261</b>  |
| <b>qOA</b>        | <b>-1.1179</b> | <b>-1.1331</b> |
| <b>Compound 3</b> |                |                |
| <b>qOD</b>        | <b>-1.1072</b> | <b>-1.1317</b> |
| <b>qH3</b>        | <b>0.6191</b>  | <b>0.6205</b>  |
| <b>qOA</b>        | <b>-1.0960</b> | <b>-1.1224</b> |
| <b>Compound 4</b> |                |                |
| <b>qOD</b>        | <b>-1.1110</b> | <b>-1.1366</b> |
| <b>qH4</b>        | <b>0.6192</b>  | <b>0.6186</b>  |
| <b>qOA</b>        | <b>-1.1045</b> | <b>-1.1335</b> |

**Table S2 (Continuation).** AIM atomic charges computed *in vacuo* and with solvent reaction field (PCM and water as a solvent) at the PBE-D3/aug-cc-pVTZ level of theory.

| Atomic charge [e] | Gas phase      | PCM            |
|-------------------|----------------|----------------|
| <b>Compound 5</b> |                |                |
| <b>qOD</b>        | <b>-1.1126</b> | <b>-1.1381</b> |
| <b>qH5</b>        | <b>0.6195</b>  | <b>0.6207</b>  |
| <b>qOA</b>        | <b>-1.1173</b> | <b>-1.1318</b> |
| <b>qN</b>         | <b>-1.1314</b> | <b>-1.1132</b> |
| <b>qH</b>         | <b>0.4832</b>  | <b>0.4658</b>  |
| <b>qOA</b>        | <b>-1.1173</b> | <b>-1.1318</b> |

**Table S3.** Bond Critical Points (BCPs) obtained for the intramolecular hydrogen bridges in the studied quinolone carboxylic acid derivatives. Electron density  $\rho_{\text{BCP}}$  is given in  $\text{e}^*\text{a}_0^{-3}$  atomic units, and its Laplacian  $\nabla^2\rho_{\text{BCP}}$  in  $\text{e}^*\text{a}_0^{-5}$  units.

| BCP               | Gas phase           |                             | PCM                 |                             |
|-------------------|---------------------|-----------------------------|---------------------|-----------------------------|
|                   | $\rho_{\text{BCP}}$ | $\nabla^2\rho_{\text{BCP}}$ | $\rho_{\text{BCP}}$ | $\nabla^2\rho_{\text{BCP}}$ |
| <b>Compound 1</b> |                     |                             |                     |                             |
| <b>OD-H1</b>      | <b>0.3122</b>       | <b>-2.1138</b>              | <b>0.2949</b>       | <b>-1.8894</b>              |
| <b>H1...OA</b>    | <b>0.0712</b>       | <b>0.1045</b>               | <b>0.0853</b>       | <b>0.0909</b>               |
| <b>Compound 2</b> |                     |                             |                     |                             |
| <b>OD-H2</b>      | <b>0.3117</b>       | <b>-2.1050</b>              | <b>0.2920</b>       | <b>-1.8481</b>              |
| <b>H2...OA</b>    | <b>0.0731</b>       | <b>0.1048</b>               | <b>0.0891</b>       | <b>0.0878</b>               |
| <b>Compound 3</b> |                     |                             |                     |                             |
| <b>OD-H3</b>      | <b>0.3143</b>       | <b>-2.1431</b>              | <b>0.2965</b>       | <b>-1.9174</b>              |
| <b>H3...OA</b>    | <b>0.0608</b>       | <b>0.0975</b>               | <b>0.0762</b>       | <b>0.0879</b>               |
| <b>Compound 4</b> |                     |                             |                     |                             |
| <b>OD-H4</b>      | <b>0.3098</b>       | <b>-2.0868</b>              | <b>0.2871</b>       | <b>-1.7849</b>              |
| <b>H4...OA</b>    | <b>0.0648</b>       | <b>0.0956</b>               | <b>0.0841</b>       | <b>0.0794</b>               |
| <b>Compound 5</b> |                     |                             |                     |                             |
| <b>OD-H5</b>      | <b>0.3131</b>       | <b>-2.1233</b>              | <b>0.2915</b>       | <b>-1.8441</b>              |
| <b>H5...OA</b>    | <b>0.0648</b>       | <b>0.0988</b>               | <b>0.0828</b>       | <b>0.0846</b>               |
| <b>N-H</b>        | <b>0.3318</b>       | <b>-1.9023</b>              | <b>0.3361</b>       | <b>-1.9002</b>              |
| <b>H...OA</b>     | <b>0.0372</b>       | <b>0.1207</b>               | <b>0.0333</b>       | <b>0.1158</b>               |



**Table S4.** Wiberg bond indices calculated based on Natural Atomic Orbitals (NAO) at the PBE-D3/aug-cc-pVTZ level of theory.

| <b>Atom pair</b> | <b>Gas phase</b> | <b>PCM</b>    |
|------------------|------------------|---------------|
| <b>H1...OA</b>   | <b>0.1283</b>    | <b>0.1565</b> |
| <b>H2...OA</b>   | <b>0.1296</b>    | <b>0.1616</b> |
| <b>H3...OA</b>   | <b>0.1143</b>    | <b>0.1456</b> |
| <b>H4...OA</b>   | <b>0.1237</b>    | <b>0.1637</b> |
| <b>H5...OA</b>   | <b>0.1172</b>    | <b>0.1537</b> |
| <b>H...OA</b>    | <b>0.0399</b>    | <b>0.0328</b> |

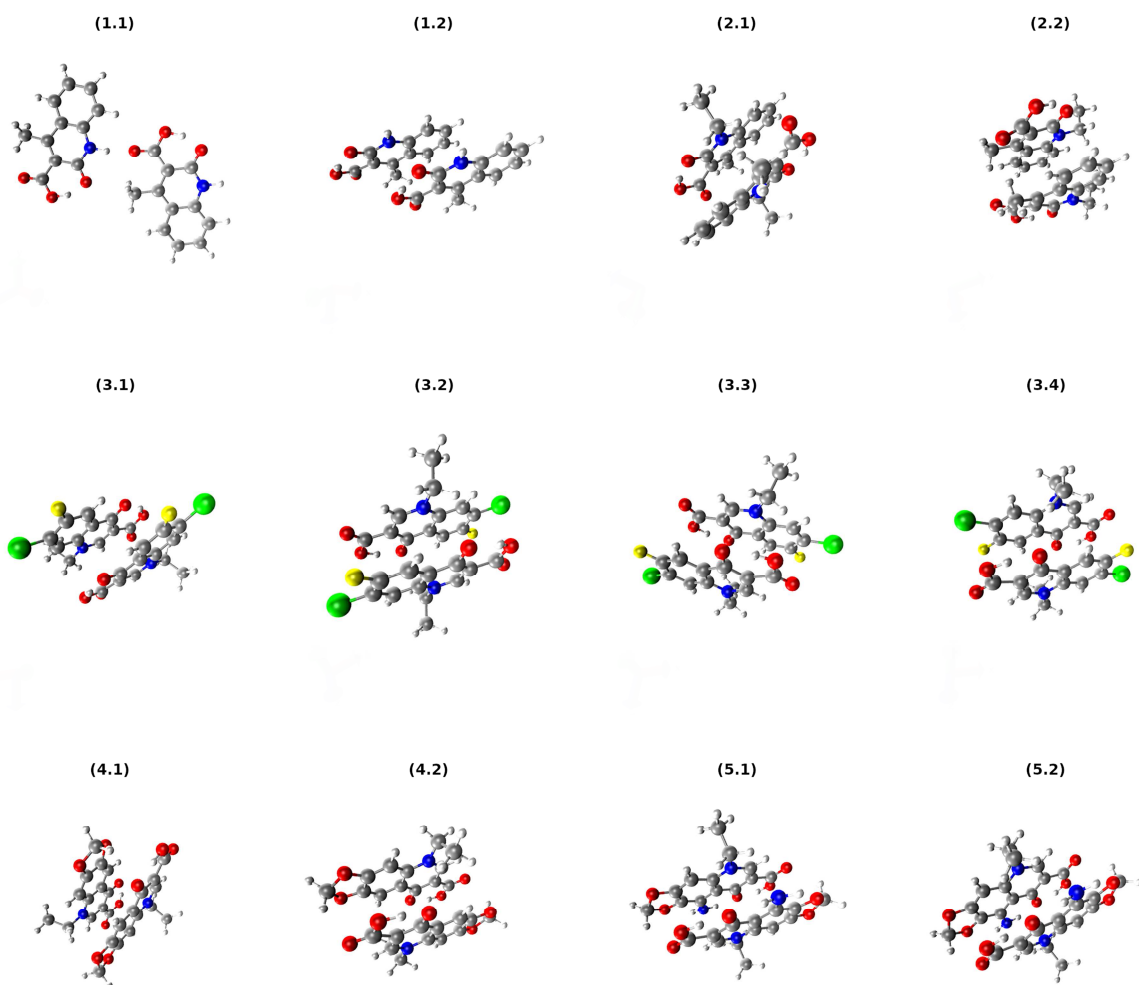

**Figure S2.** Dimers of the quinolone carboxylic acid derivatives obtained as a result of the geometry optimization at the PBE-D3/aug-cc-pVDZ level of theory studied based on the SAPT. Atom color coding: oxygen atoms -red, hydrogen atoms - white, carbon atoms - grey, chlorine atom - green, fluorine atoms - yellow and nitrogen atoms – blue.

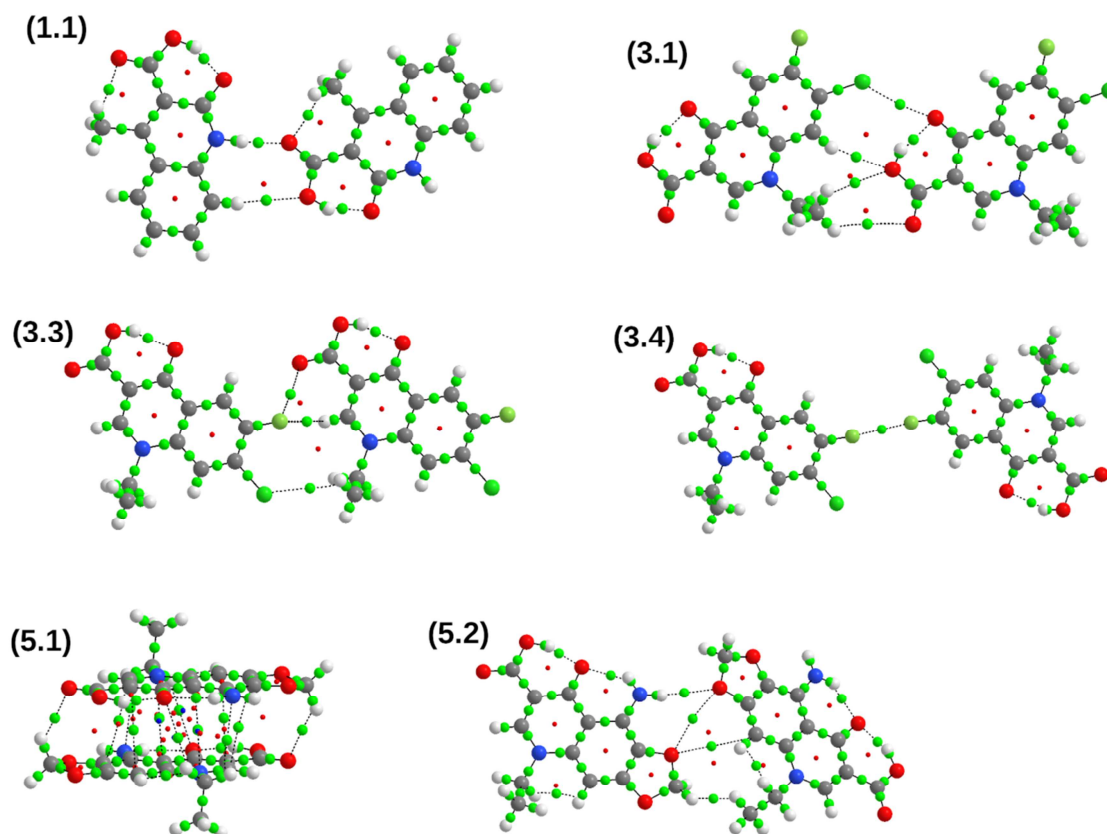

**Figure S3.** Topological maps of electron density based on AIM theory for the selected dimers of the quinolone carboxylic acid derivatives at the experimental X-ray geometry. Small green spheres denote Bond Critical Points (BCPs), small red spheres denote Ring Critical Points (RCPs). Atom color coding: oxygen atoms– red, hydrogen atoms – white, carbon atoms – grey, chlorine atom – green, fluorine atom – lime green and nitrogen atoms – blue.

**Table S5.** Bond Critical Points (BCPs) obtained for the intermolecular contacts in the selected dimers of the studied quinolone carboxylic acid derivatives at the experimental (X-ray) geometry. Electron density  $\rho_{\text{BCP}}$  is given in  $\text{e}^*\text{a}_0^{-3}$  atomic units, and its Laplacian  $\nabla^2\rho_{\text{BCP}}$  in  $\text{e}^*\text{a}_0^{-5}$  units. The potential energy density  $V_{\text{BCP}}$  is given in hartree\* $\text{a}_0^{-3}$  atomic units, while the corresponding dissociation energy  $D_{\text{e,BCP}}$  is given in kcal/mol according to the Espinosa equation [85]. The atoms marked with apostrophe are located in the monomer 2 of the dimeric system.

| Interaction:                                                | $\rho_{\text{BCP}}$    | $\nabla^2\rho_{\text{BCP}}$ | $V_{\text{BCP}}$           | $D_{\text{e,BCP}}$ |
|-------------------------------------------------------------|------------------------|-----------------------------|----------------------------|--------------------|
| <b>Dimer 1.1</b>                                            |                        |                             |                            |                    |
| <b>N-H...O'</b>                                             | <b>0.0330</b>          | <b>0.1061</b>               | <b>-0.02964</b>            | <b>9.30</b>        |
| <b>C8-H...OD'</b>                                           | <b>0.0039</b>          | <b>0.0139</b>               | <b>-0.00190</b>            | <b>0.60</b>        |
|                                                             |                        |                             | <b>sum:</b>                | <b>9.90</b>        |
| <b>Dimer 3.1</b>                                            |                        |                             |                            |                    |
| <b>C7-Cl...OA'</b>                                          | <b>0.0085</b>          | <b>0.0352</b>               | <b>-0.00485</b>            | <b>1.52</b>        |
| <b>C8-H...OD'</b>                                           | <b>0.0079</b>          | <b>0.0314</b>               | <b>-0.00441</b>            | <b>1.38</b>        |
| <b>C-H(ethyl)...OD'</b>                                     | <b>0.0032</b>          | <b>0.0123</b>               | <b>-0.00154</b>            | <b>0.48</b>        |
| <b>C-H(ethyl)...O'</b>                                      | <b>0.0020</b>          | <b>0.0067</b>               | <b>-0.00083</b>            | <b>0.26</b>        |
|                                                             |                        |                             | <b>sum:</b>                | <b>3.64</b>        |
| <b>Dimer 3.3</b>                                            |                        |                             |                            |                    |
| <b>C6-F...O'</b>                                            | <b>0.0040</b>          | <b>0.0144</b>               | <b>-0.00234</b>            | <b>0.73</b>        |
| <b>C6-F...H'-C2'</b>                                        | <b>0.0057</b>          | <b>0.0239</b>               | <b>-0.00348</b>            | <b>1.09</b>        |
| <b>C7-Cl...H'-C'(ethyl)</b>                                 | <b>0.0058</b>          | <b>0.0210</b>               | <b>-0.00278</b>            | <b>0.87</b>        |
|                                                             |                        |                             | <b>sum:</b>                | <b>2.69</b>        |
| <b>Dimer 3.4</b>                                            |                        |                             |                            |                    |
| <b>C6-F...F'-C6'</b>                                        | <b>0.0063</b>          | <b>0.0348</b>               | <b>-0.00478</b>            | <b>1.50</b>        |
| <b>Dimer 5.1</b>                                            |                        |                             |                            |                    |
| <b>multiple (12) contacts between the stacked molecules</b> | <b>0.0039 ÷ 0.0060</b> | <b>0.0126 ÷ 0.0214</b>      | <b>-0.00157 ÷ -0.00311</b> | <b>sum: 7.83</b>   |
| <b>Dimer 5.2</b>                                            |                        |                             |                            |                    |
| <b>N-H...O(ring)'</b>                                       | <b>0.0060</b>          | <b>0.0246</b>               | <b>-0.00342</b>            | <b>1.07</b>        |
| <b>O(ring3)...O(ring3)'</b>                                 | <b>0.0020</b>          | <b>0.0076</b>               | <b>-0.00100</b>            | <b>0.31</b>        |
| <b>O(ring3)...C8'</b>                                       | <b>0.0017</b>          | <b>0.0061</b>               | <b>-0.00069</b>            | <b>0.22</b>        |
| <b>C(ring3)-H...H'-C'(ethyl)</b>                            | <b>0.0129</b>          | <b>0.0375</b>               | <b>-0.00690</b>            | <b>2.16</b>        |
|                                                             |                        |                             | <b>sum:</b>                | <b>3.76</b>        |

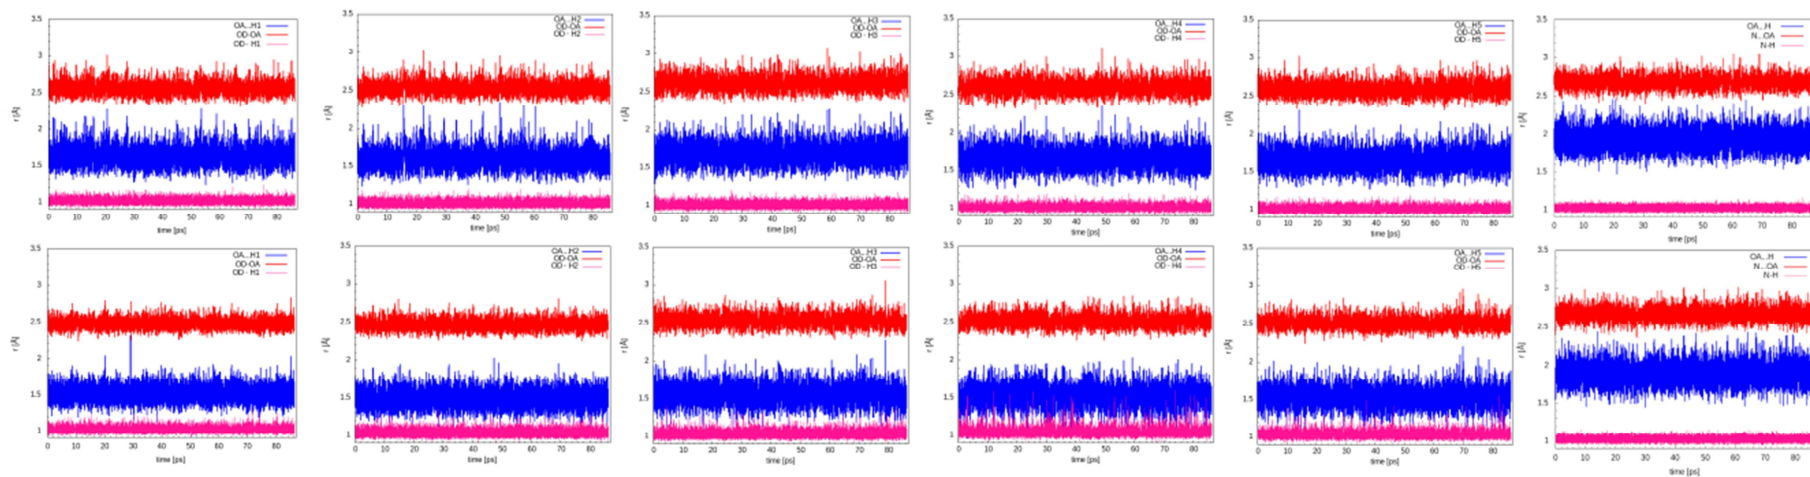

**Figure S4.** Time evolution of atoms involved in the intramolecular hydrogen bond formation. Top panel: CPMD results of the gas phase. Bottom panel: CPMD results of the solid state.
